# Supplementary material for: Loss of the neurodevelopmental disease-associated gene miR-146a impairs neural progenitor differentiation and causes learning and memory deficits
Source: PubMed Central journal article supplement (PMC7106595; doi:10.1186/s13229-020-00328-3), 2020-03-30
Supplement: 13229_2020_328_MOESM1_ESM.pdf [file 13229_2020_328_MOESM1_ESM.pdf]

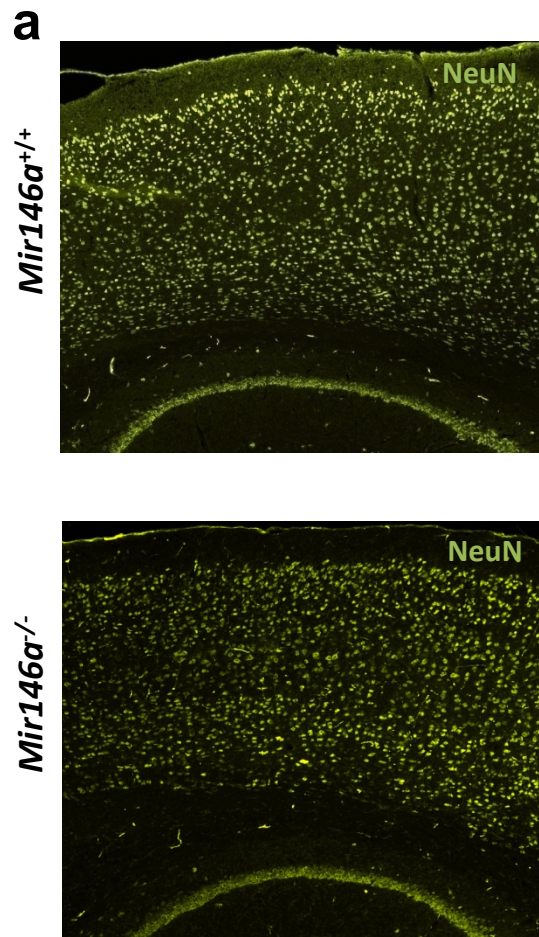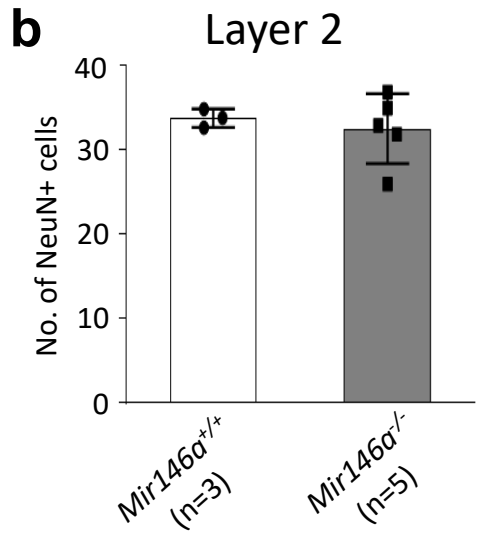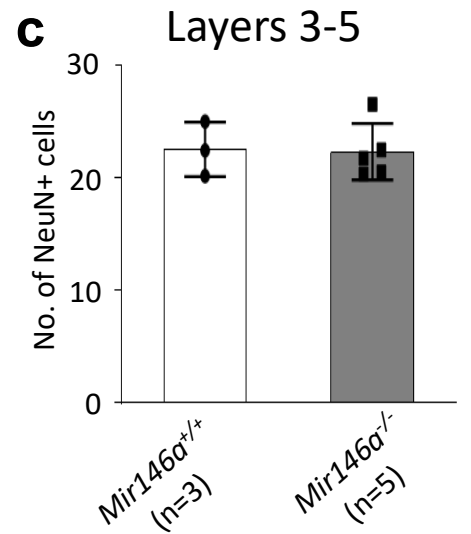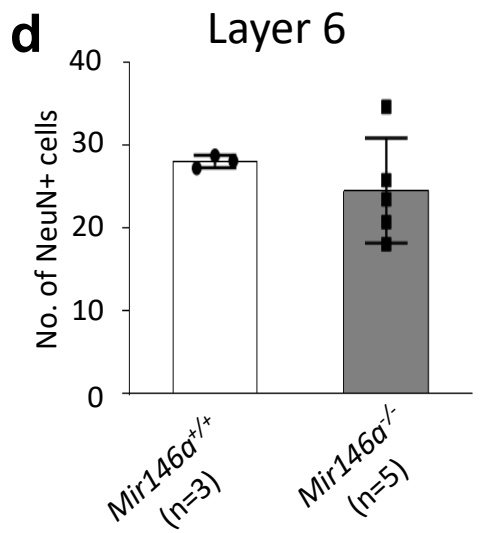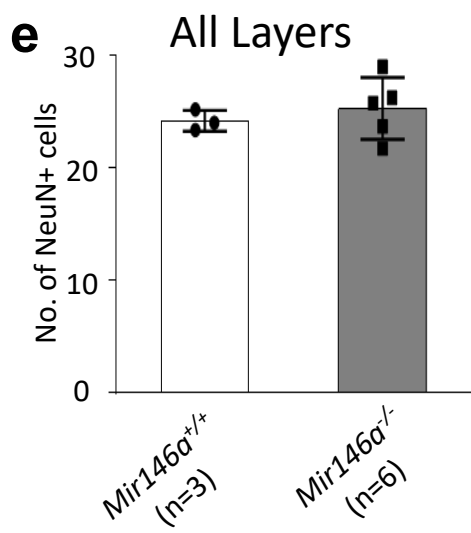

Figure S1, Fregeac *et al*

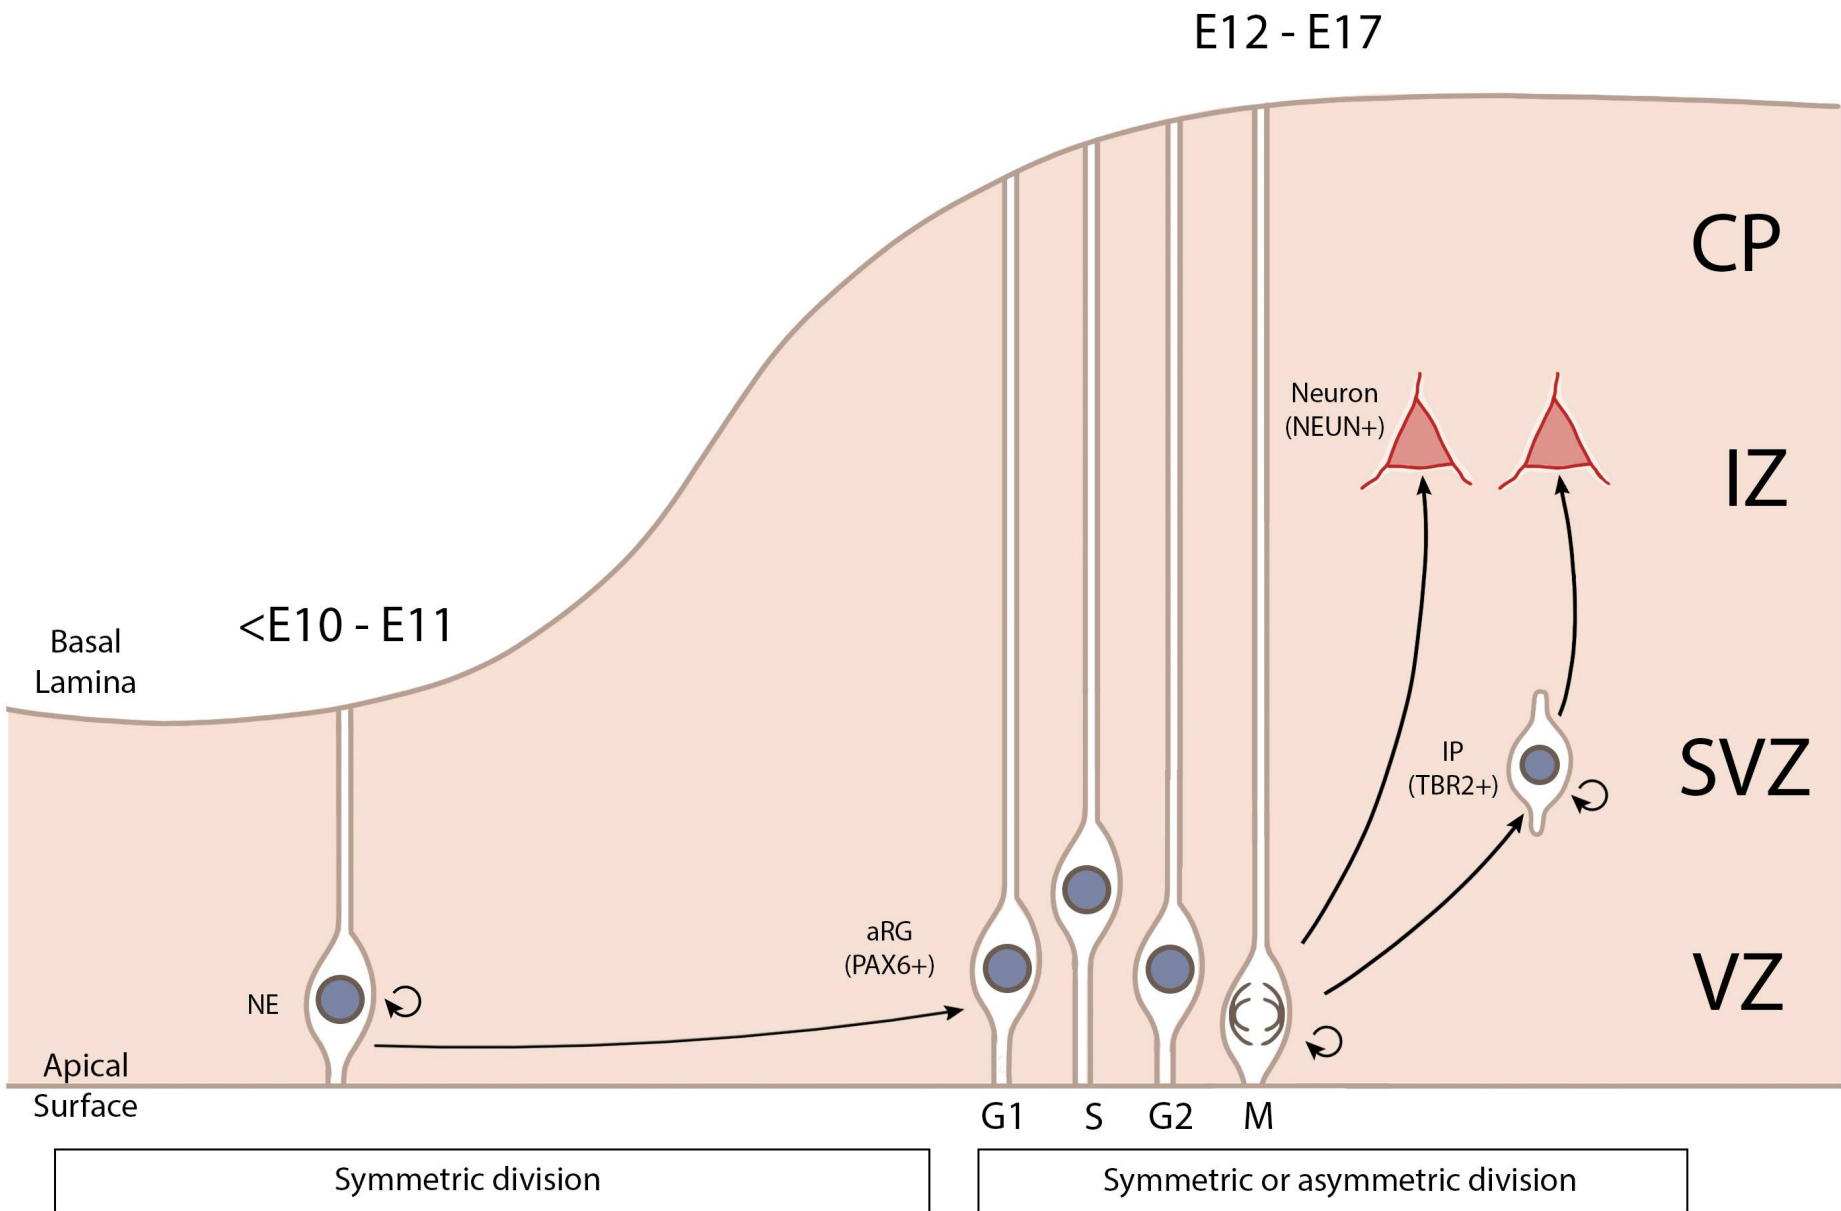

Figure S2, Fregeac *et al*

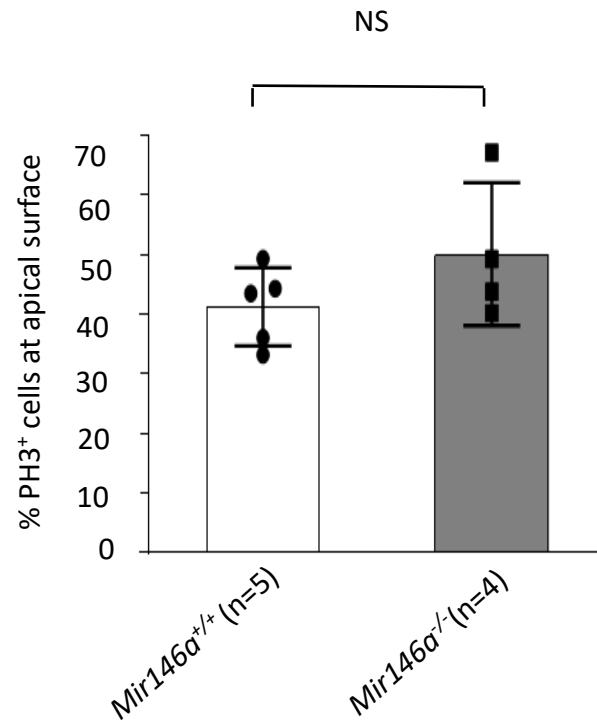

Figure S3, Fregeac *et al*

**a**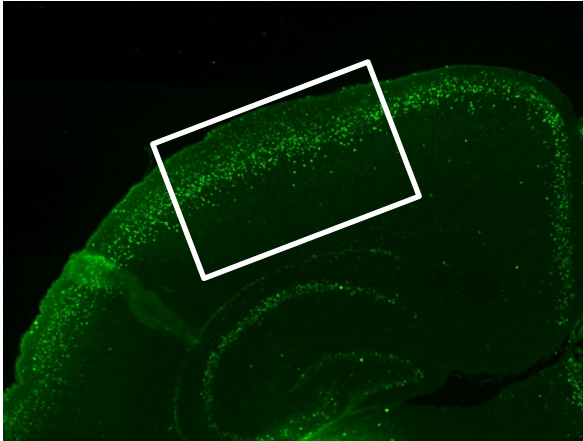**b**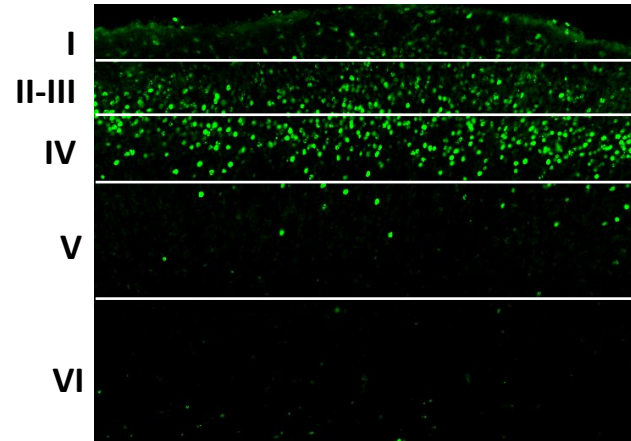**c**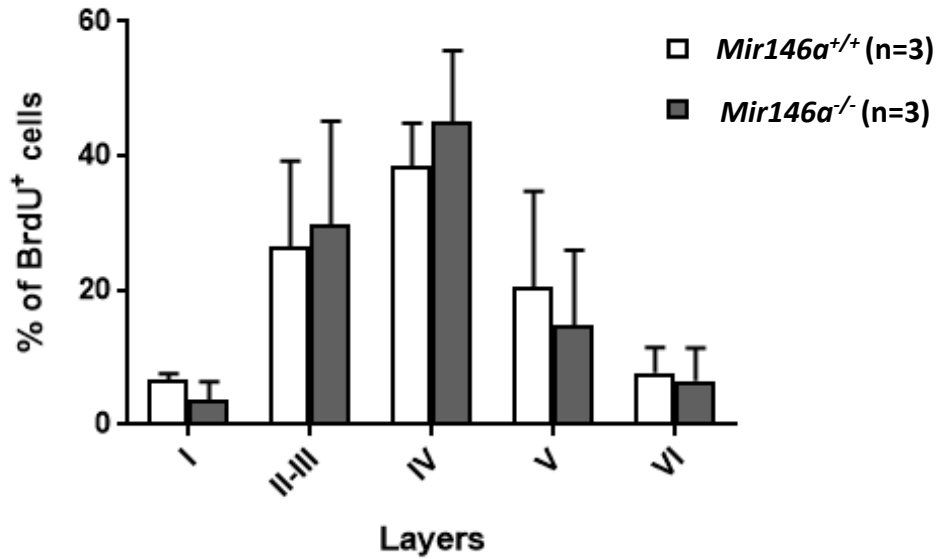

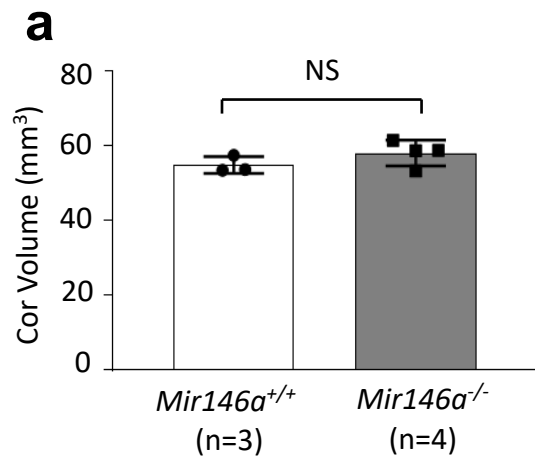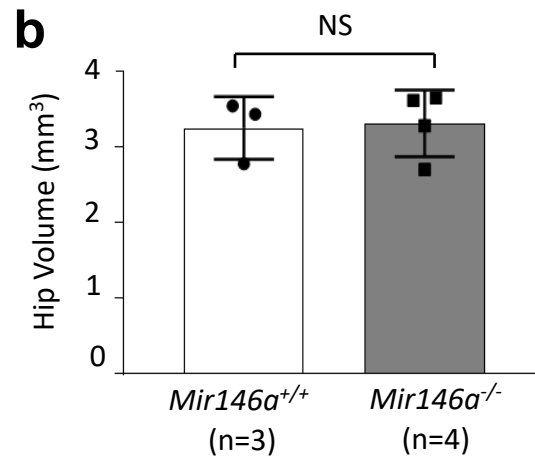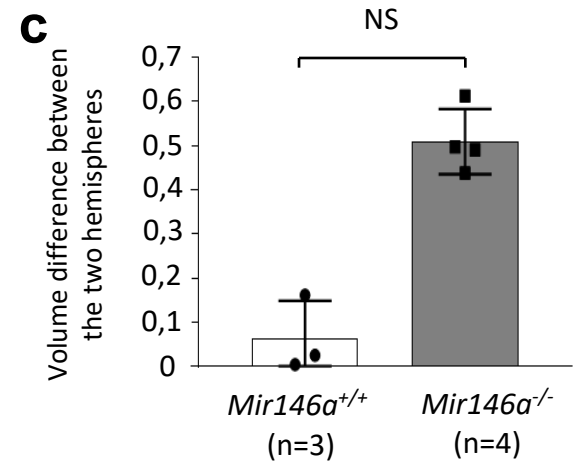

Figure S5, Fregeac *et al*

**a**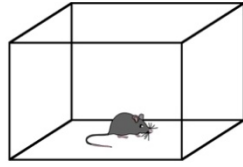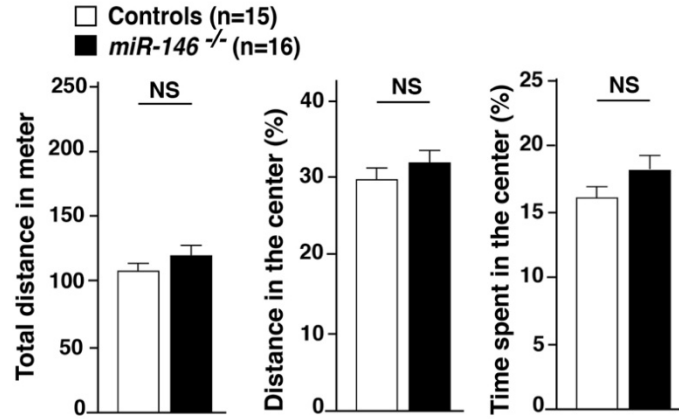**b**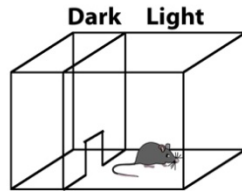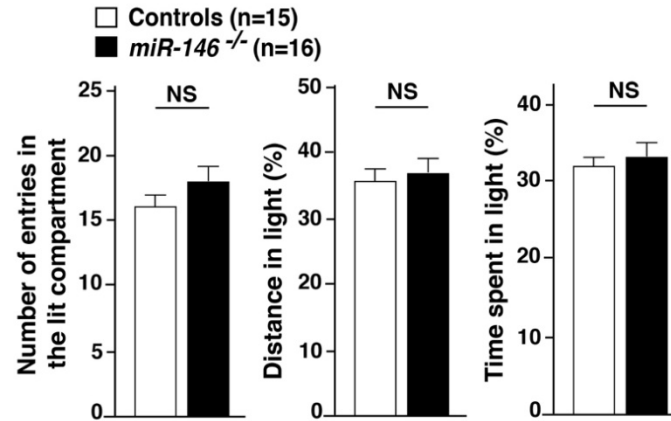

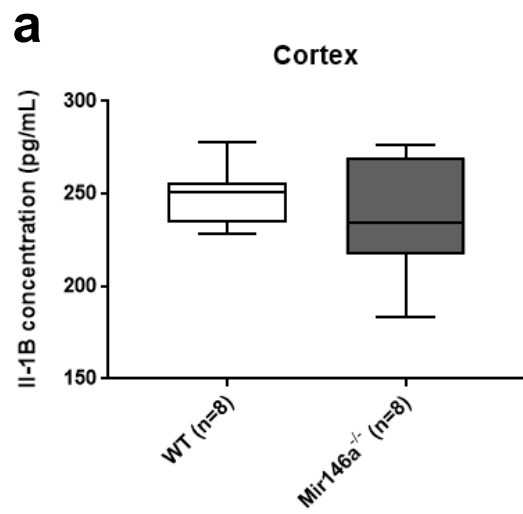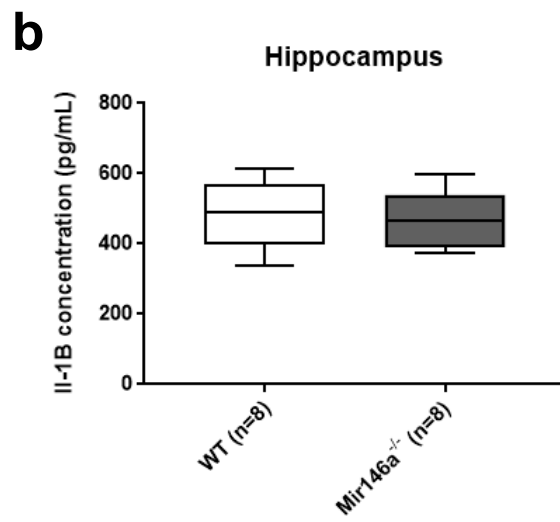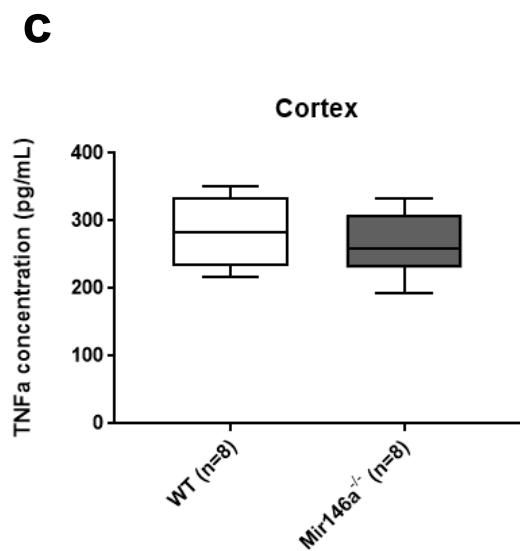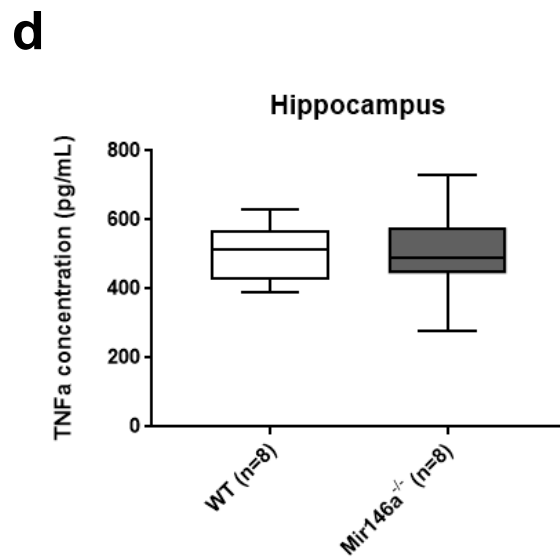

Figure S7, Fregeac *et al*
